# Supplementary material for: Structural evidence for intermediates during O2 formation in photosystem II
Source: PubMed Central journal article supplement (PMC10191843; doi:10.1038/s41586-023-06038-z), 2023-05-03
Supplement: 41586_2023_6038_MOESM1_ESM.pdf [file 41586_2023_6038_MOESM1_ESM.pdf]

---

**Supplementary information**

---

**Structural evidence for intermediates during O<sub>2</sub> formation in photosystem II**

---

In the format provided by the authors and unedited

## Supplementary Information

### Structural evidence for intermediates during O<sub>2</sub> formation in Photosystem II

Asmit Bhowmick<sup>1#</sup>, Rana Hussein<sup>2#</sup>, Isabel Bogacz<sup>1#</sup>, Philipp S. Simon<sup>1#</sup>, Mohamed Ibrahim<sup>2¶</sup>, Ruchira Chatterjee<sup>1</sup>, Margaret D. Doyle<sup>1</sup>, Mun Hon Cheah<sup>3</sup>, Thomas Fransson<sup>4</sup>, Petko Chernev<sup>3</sup>, In-Sik Kim<sup>1</sup>, Hiroki Makita<sup>1</sup>, Medhanjali Dasgupta<sup>1</sup>, Corey J. Kaminsky<sup>1</sup>, Miao Zhang<sup>1</sup>, Julia Gätcke<sup>2</sup>, Stephanie Haupt<sup>2</sup>, Isabela I. Nangca<sup>1</sup>, Stephen M. Keable<sup>1</sup>, Orkun Aydin<sup>3</sup>, Kensuke Tono<sup>5,6</sup>, Shigeki Owada<sup>5,6</sup>, Leland B. Gee<sup>7</sup>, Franklin D. Fuller<sup>7</sup>, Alexander Batyuk<sup>7</sup>, Roberto Alonso-Mori<sup>7</sup>, James M. Holton<sup>1,8,9</sup>, Daniel W. Paley<sup>1</sup>, Nigel W. Moriarty<sup>1</sup>, Fikret Mamedov<sup>3</sup>, Paul D. Adams<sup>1,10</sup>, Aaron S. Brewster<sup>1</sup>, Holger Dobbek<sup>2</sup>, Nicholas K. Sauter<sup>1</sup>, Uwe Bergmann<sup>11</sup>, Athina Zouni<sup>2\*</sup>, Johannes Messinger<sup>3,12\*</sup>, Jan Kern<sup>1</sup>, Junko Yano<sup>1\*</sup>, Vittal K. Yachandra<sup>1\*</sup>

<sup>1</sup>Molecular Biophysics and Integrated Bioimaging Division, Lawrence Berkeley National Laboratory, Berkeley, CA 94720, USA.

<sup>2</sup>Humboldt-Universität zu Berlin, Department of Biology, 10099 Berlin, Germany.

<sup>3</sup>Department of Chemistry - Ångström, Molecular Biomimetics, Uppsala University, SE 75120 Uppsala, Sweden.

<sup>4</sup>Department of Theoretical Chemistry and Biology, KTH Royal Institute of Technology, Stockholm, Sweden.

<sup>5</sup>Japan Synchrotron Radiation Research Institute, 1-1-1 Kouto, Sayo-cho, Sayo-gun, Hyogo, 679-5198, Japan

<sup>6</sup>RIKEN SPring-8 Center, 1-1-1 Kouto, Sayo-cho, Sayo-gun, Hyogo, 679-5148, Japan

<sup>7</sup>Linac Coherent Light Source, SLAC National Accelerator Laboratory, Menlo Park, CA 94025, USA.

<sup>8</sup>Department of Biochemistry and Biophysics, University of California, San Francisco, San Francisco, California, CA 94158, USA

<sup>9</sup>SSRL, SLAC National Accelerator Laboratory, Menlo Park, CA 94025, USA

<sup>10</sup>Department of Bioengineering, University of California, Berkeley, CA 94720, USA.

<sup>11</sup>Department of Physics, University of Wisconsin–Madison, Madison, WI 53706, USA.

<sup>12</sup>Department of Chemistry, Umeå University, SE 90187 Umeå, Sweden.

#These authors contributed equally

<sup>¶</sup>Present address: Institute of Molecular Medicine, University of Lübeck, 23562 Lübeck, Germany.

\*Correspondence should be addressed to [athina.zouni@hu-berlin.de](mailto:athina.zouni@hu-berlin.de),  
[johannes.messinger@kemi.uu.se](mailto:johannes.messinger@kemi.uu.se), [jyano@lbl.gov](mailto:jyano@lbl.gov), [vkyachandra@lbl.gov](mailto:vkyachandra@lbl.gov)

**This file contains Supplementary Table 1 and 2.**

### **Table of Contents**

|                                                                                                                                   |   |
|-----------------------------------------------------------------------------------------------------------------------------------|---|
| <b>Supplementary Table 1:</b> Water numbering convention used in this work and relation to water numbering in deposited PDB files | 3 |
| <b>Supplementary Table 2:</b> Collection details for various datasets                                                             | 6 |

**Supplementary Table 1.** Water numbering convention used in this work and relation to residue numbers in pdb files (note that numbers are only given for the first monomer in each model, “x” indicates water not present, for W1-W4 only the refined component is given for 3F(50 $\mu$ s) and later time points

| Numbering in manuscript | Channel   | 2F   | 3F (50 $\mu$ s) | 3F (250 $\mu$ s) | 3F (500 $\mu$ s) | 3F (730 $\mu$ s) | 3F (1200 $\mu$ s) | 3F (2000 $\mu$ s) | 3F (4000 $\mu$ s) | 3F (200ms) |
|-------------------------|-----------|------|-----------------|------------------|------------------|------------------|-------------------|-------------------|-------------------|------------|
| W1                      |           | A713 | A724            | A715             | A740             | A730             | A728              | A723              | A721              | A722       |
| W2                      |           | A747 | A755            | A746             | A800             | A752             | A769              | A739              | A737              | A733       |
| W3                      |           | A786 | A781            | A797             | A808             | A805             | A796              | A813              | A804              | A797       |
| W4                      |           | A732 | A715            | A730             | A765             | A758             | A754              | A748              | A747              | A752       |
| W19                     | O4        | A711 | A703            | A704             | A722             | A702             | A701              | A706              | A706              | A704       |
| W20                     | O4        | x    | x               | x                | x                | x                | x                 | x                 | C607              | C602       |
| W21                     | C11A/B    | A712 | A714            | A724             | A745             | A727             | A716              | A728              | A735              | D505       |
| W22                     | C11A/B    | A755 | A727            | A771             | A753             | A720             | A735              | A722              | A733              | A762       |
| W23                     | C11A/B    | A782 | A788            | A806             | A791             | A786             | A772              | A774              | A792              | A781       |
| W24                     | C11A/B    | A798 | A790            | A802             | A809             | A821             | A792              | A827              | A810              | A780       |
| W25                     | C11A/B    | A741 | A705            | A708             | A733             | A723             | A747              | A716              | A701              | A720       |
| W26                     | O1A/B     | A716 | A778            | A801             | A713             | A787             | A718              | A797              | A742              | A706       |
| W27                     | O1A/B     | A707 | A701            | A701             | A707             | A705             | A802              | A750              | A716              | A705       |
| W28                     | O1A/B, Yz | A805 | A801            | A805             | A820             | A824             | A808              | A825              | A817              | A795       |
| W29                     | O1A/B, Yz | A763 | A763            | A756             | A816             | A799             | A765              | A787              | A807              | A798       |
| W30                     | O1A/B, Yz | A706 | A737            | A733             | A724             | A707             | A703              | A727              | A728              | A728       |
| W31                     | O1A/B     | A725 | A733            | A714             | A739             | A709             | A705              | A704              | A702              | A712       |
| W32                     | O1A/B     | A806 | A800            | A818             | A819             | A826             | A810              | A828              | A825              | A808       |
| W33                     | O1A/B     | A792 | A792            | A798             | A794             | A759             | A763              | A786              | A799              | A801       |
| W34                     | O1B       | A749 | A770            | A719             | A706             | A716             | A719              | A715              | A754              | A715       |
| W35                     | O1B       | C605 | C618            | C608             | C611             | C651             | C606              | C626              | C643              | C626       |
| W36                     | O1B       | D572 | A721            | D528             | D567             | D546             | D560              | D526              | A739              | A750       |
| W37                     | O1B       | U201 | U201            | U201             | U209             | U202             | U210              | U203              | U203              | U202       |
| W38                     | O1B       | V348 | V340            | V345             | V346             | V348             | V345              | V354              | V351              | V337       |
| W39                     | O1A/B     | A799 | A798            | A770             | A810             | A807             | A807              | A766              | A789              | A806       |
| W40                     | C11A      | A705 | A702            | A713             | A732             | A713             | A702              | A707              | A709              | A703       |
| W41                     | C11A      | D526 | D513            | D530             | D510             | D525             | D503              | D563              | D520              | D529       |
| W42                     | C11A      | A791 | A793            | A799             | A812             | A819             | A797              | A798              | A808              | A792       |
| W43                     | C12       | A764 | A732            | A790             | A763             | A788             | A722              | A735              | A711              | A771       |
| W44                     | C12       | A800 | A787            | A810             | A801             | C734             | A770              | C739              | C721              | A787       |
| W45                     | C12       | C622 | C674            | C618             | C645             | C648             | C679              | C628              | C640              | C641       |
| W46                     | C12       | C682 | C647            | C686             | C670             | C697             | C662              | C714              | C695              | C675       |
| W47                     | C12       | C668 | C651            | C677             | C643             | C686             | C660              | C662              | C685              | C676       |
| W48                     | O4        | A748 | A753            | A721             | A805             | A765             | A789              | A772              | A755              | A742       |

**Supplementary Table 1 continued**

| Numbering in manuscript | Channel | 2F   | 3F (50µs) | 3F (250µs) | 3F (500µs) | 3F (730µs) | 3F (1200µs) | 3F (2000µs) | 3F (4000µs) | 3F (200ms) |
|-------------------------|---------|------|-----------|------------|------------|------------|-------------|-------------|-------------|------------|
| W49                     | O4      | A761 | A734      | A750       | A736       | A748       | A741        | A710        | A714        | A718       |
| W50                     | O4      | C690 | C696      | C720       | C682       | C732       | C720        | C748        | C741        | C691       |
| W51                     | O4      | C704 | C691      | C718       | A804       | C733       | C707        | A824        | C728        | C711       |
| W52                     | O4      | A740 | A709      | A728       | A720       | A736       | A714        | A738        | A712        | A713       |
| W53                     | O4      | C679 | C672      | C689       | C696       | C669       | C678        | C711        | C698        | C648       |
| W54                     | Yz      | A784 | A757      | A788       | A786       | A817       | A806        | A821        | A796        | A791       |
| W55                     | Yz      | A730 | A720      | A764       | A738       | A763       | A717        | A717        | A764        | A719       |
| W56                     | Yz      | C611 | C626      | C649       | C609       | C608       | C614        | C607        | C616        | C605       |
| W57                     | Yz      | A715 | A718      | A707       | A705       | A704       | A709        | A730        | A704        | A739       |
| W58                     | Yz      | A788 | A769      | A794       | A775       | A791       | A790        | A785        | A774        | A760       |
| W59                     | C11B    | A766 | A766      | A783       | A813       | A780       | A767        | A702        | A703        | A774       |
| W60                     | C11B    | D580 | D576      | D545       | D587       | D592       | D572        | D593        | D550        | D563       |
| W61                     | C11A/B  | A771 | A776      | A772       | A790       | A756       | A780        | A775        | A734        | A789       |
| W62                     | C11A/B  | A718 | A716      | A738       | A747       | A745       | A704        | A731        | A724        | A714       |
| W66                     | C11B    | D522 | D549      | D521       | D548       | O339       | D513        | D515        | D533        | D541       |
| W67                     | C11B    | O312 | O333      | O335       | D581       | D561       | O358        | O352        | D569        | D554       |
| W68                     | C11B    | D563 | D563      | D595       | O376       | D603       | D590        | D598        | D588        | D589       |
| W69                     | C11B    | D515 | O309      | D522       | O328       | O315       | O313        | O346        | O311        | O308       |
| W70                     | C11B    | D601 | D592      | D616       | D618       | D626       | D599        | D621        | D611        | D610       |
| W71                     | O4      | A756 | A743      | A749       | A788       | A728       | A731        | A768        | A723        | A724       |
| W72                     | O4      | D594 | D581      | D602       | D605       | D612       | D580        | D606        | D591        | D597       |
| W73                     | O4      | U223 | U220      | U238       | U226       | U236       | U232        | U239        | U231        | U231       |
| W74                     | O4      | O324 | O307      | C625       | O326       | C616       | C615        | O315        | C627        | C625       |
| W75                     | O4      | U216 | U209      | U225       | O340       | O316       | U214        | U221        | O349        | U217       |
| W76                     | O1B     | C618 | C656      | V350       | C727       | C744       | x           | C738        | C749        | V336       |
| W77                     | O1B     | V350 | V343      | V350       | V364       | V364       | V348        | V358        | V359        | X          |
| W101                    | O1B     | D527 | U208      | U226       | D530       | D537       | D556        | D548        | D530        | D560       |
| W102                    | O1B     | B857 | B842      | B868       | B995       | B886       | B846        | B863        | B867        | B832       |
| W103                    | O1A     | C650 | C639      | C690       | C603       | C679       | C651        | C681        | C647        | C663       |
| W104                    | O1A     | C725 | C697      | C730       | C735       | C754       | C730        | C763        | C756        | C721       |
| W106                    | O1A     | C716 | C694      | C728       | C724       | C746       | C722        | C761        | C743        | C722       |
| W107                    | O1A     | C693 | C649      | C712       | C663       | C658       | C642        | C690        | C664        | C702       |
| W117                    | C11A    | D597 | D589      | D608       | D610       | D619       | D596        | D618        | D605        | D601       |
| W119                    | C11A    | A727 | A723      | A737       | A726       | A710       | A734        | A737        | A708        | A717       |
| W121                    | C11A    | O370 | O353      | O380       | O400       | O368       | O360        | O363        | O367        | O368       |
| W122                    | C11A    | O335 | O339      | O378       | O396       | O336       | O362        | O377        | O366        | O350       |
| W125                    | C11A    | O354 | O337      | D579       | D571       | O352       | D542        | O331        | D564        | O327       |
| W126                    | C11A    | D588 | O360      | D582       | D599       | D615       | D579        | D600        | D566        | D594       |
| W127                    | C11A    | D582 | D570      | D605       | D579       | A793       | A784        | D583        | D561        | D572       |
| W129                    | C11A    | A783 | A754      | A784       | D598       | D610       | A746        | A800        | A805        | A759       |
| W145                    | C11A    | x    | x         | x          | x          | x          | x           | x           | x           | x          |
| W150                    | C11A    | x    | x         | x          | x          | x          | x           | x           | x           | x          |
| W151                    | O1B     | x    | x         | x          | x          | x          | x           | x           | x           | C714       |
| 152                     | C11A    | A736 | A747      | A727       | A718       | A714       | A712        | A718        | A725        | A726       |
| 153                     | C11A    | O322 | O334      | O334       | O355       | O334       | O325        | O338        | O352        | O316       |
| 154                     | C11A    | O356 | O335      | O355       | O347       | O357       | O338        | O360        | O360        | O353       |
| 160                     | C11B    | B794 | B771      | B799       | B958       | B794       | B773        | B793        | B778        | B792       |
| 161                     | C11B    | D513 | D503      | D520       | D512       | D516       | D514        | D505        | D505        | D511       |
| 162                     | C11B    | B725 | B706      | B762       | B978       | B727       | B710        | B777        | B737        | B745       |

**Supplementary Table 1 continued**

| Numbering in manuscript | Channel | 2F   | 3F (50µs) | 3F (250µs) | 3F (500µs) | 3F (730µs) | 3F (1200µs) | 3F (2000µs) | 3F (4000µs) | 3F (200ms) |
|-------------------------|---------|------|-----------|------------|------------|------------|-------------|-------------|-------------|------------|
| 163                     | C11B    | D538 | D517      | O322       | D539       | O320       | D536        | O336        | O320        | D528       |
| 164                     | C11B    | O314 | O314      | O318       | O331       | O328       | O326        | O333        | O318        | O304       |
| 165                     | C11B    | B756 | B750      | B775       | B945       | B787       | B751        | B798        | B804        | B737       |
| 166                     | C11B    | B747 | B713      | B761       | B1014      | B743       | B709        | B776        | B770        | B733       |
| 167                     | C11B    | D586 | D580      | D568       | D600       | D606       | D591        | D601        | D593        | D596       |
| 168                     | C11B    | B782 | B749      | O343       | O345       | B759       | B732        | O316        | O331        | B740       |
| 169                     | C11B    | B840 | O362      | B701       | B931       | x          | B701        | B880        | B860        | x          |
| 170                     | C11B    | O352 | O338      | O375       | O378       | O360       | O336        | O366        | B830        | O335       |
| 180                     | O4      | O317 | O323      | O331       | O330       | O332       | O328        | O350        | O313        | U220       |
| 181                     | O4      | U208 | U207      | U215       | U213       | U211       | U221        | U220        | U211        | U221       |
| 182                     | O4      | O373 | O363      | U245       | U233       | U240       | U233        | U244        | U239        | U232       |
| 183                     | O4      | U227 | U218      | U241       | U225       | U227       | U230        | U237        | U230        | U225       |
| 184                     | O4      | U215 | U216      | U233       | U205       | U221       | U213        | U230        | U219        | U214       |
| 190                     | O1B     | D516 | D571      | D571       | D573       | D563       | D594        | D514        | D542        | D564       |
| 191                     | O1B     | D603 | D591      | D610       | D615       | D625       | D600        | D617        | D609        | D609       |
| 192                     | O1A     | C675 | C648      | C651       | C658       | C683       | C723        | C645        | C659        | C708       |
| 193                     | O1A     | C637 | C634      | C628       | C679       | C615       | C650        | C656        | C666        | C611       |
| 194                     | O1A     | C689 | C653      | C620       | C684       | C638       | C685        | C720        | C676        | C655       |
| 195                     | O1A     | x    | V324      | V330       | V328       | V305       | V332        | V305        | V323        | V342       |
| 196                     | O1A     | C711 | C658      | C719       | C729       | C703       | C713        | x           | C748        | C718       |
| 197                     | O1A     | C676 | C654      | C707       | C638       | C659       | C712        | C659        | C700        | C684       |

**Supplementary Table 2:** Collection details for the various datasets.

| <b>Dataset</b>          | <b>Facility</b> | <b>Proposal</b> | <b>Detector Configuration</b>  | <b>Rep rate [Hz]</b> | <b>Beam energy [keV]</b> | <b>X-ray spot [<math>\mu\text{m}</math>]</b> | <b>Pulse length [fs]</b> | <b>Beam power [mJ]</b> |
|-------------------------|-----------------|-----------------|--------------------------------|----------------------|--------------------------|----------------------------------------------|--------------------------|------------------------|
| 2F                      | MFx, LCLS       | MFxLU3417       | Rayonix MX340 (3-by-3 binning) | 20                   | 9.5                      | 3                                            | 35                       | 2-3                    |
| 2F-alternate            | BL2, SACLA      | 2018B8089       | Rayonix MX300 (3-by-3 binning) | 20                   | 10.0                     | 1.5                                          | 10                       | 0.48                   |
| 3F(50 $\mu\text{s}$ )   | MFx, LCLS       | MFxLU3417       | Rayonix MX340 (3-by-3 binning) | 20                   | 9.5                      | 3                                            | 35                       | 3-3.5                  |
| 3F(250 $\mu\text{s}$ )  | MFx, LCLS       | MFxLU3417       | Rayonix MX340 (3-by-3 binning) | 20                   | 9.5                      | 3                                            | 35                       | 2-4                    |
| 3F(500 $\mu\text{s}$ )  | MFx, LCLS       | MFxLX4319       | Rayonix MX340 (3-by-3 binning) | 20                   | 9.5                      | 3                                            | 35                       | 2-4                    |
| 3F(730 $\mu\text{s}$ )  | MFx, LCLS       | MFxLS1016       | Rayonix MX170 (2-by-2 binning) | 10                   | 9.5                      | 3                                            | 35                       | 2-4                    |
| 3F(1200 $\mu\text{s}$ ) | MFx, LCLS       | MFxLV7018       | Rayonix MX340 (3-by-3 binning) | 20                   | 9.5                      | 3                                            | 35                       | 3-4                    |
| 3F(2000 $\mu\text{s}$ ) | BL2, SACLA      | 2018B8089       | Rayonix MX300 (3-by-3 binning) | 20                   | 10.0                     | 1.5                                          | 10                       | 0.48                   |
| 3F(4000 $\mu\text{s}$ ) | BL2, SACLA      | 2018B8089       | Rayonix MX300 (3-by-3 binning) | 20                   | 10.0                     | 1.5                                          | 10                       | 0.48                   |
| 3F(200ms)               | MFx, LCLS       | MFxLU3417       | Rayonix MX340 (3-by-3 binning) | 20                   | 9.5                      | 3                                            | 35                       | 2-4                    |
